# Supplementary material for: The structural and spectroscopic characterisation of three actinyl complexes with coordinated and uncoordinated perrhenate: [UO2(ReO4)2(TPPO)3], [{(UO2)(TPPO)3}2(µ2-O2)][ReO4]2and [NpO2(TPPO)4][ReO4]
Source: Royal Society of Chemistry journal article supplement (doi:10.1039/b313045b), 2004-01-01

Supporting data

Mid- and far-infrared ATR (in transmittance) and Raman (absorption) spectra of crystalline  $[\text{UO}_2(\text{ReO}_4)_2(\text{TPPO})_3]$  (1)

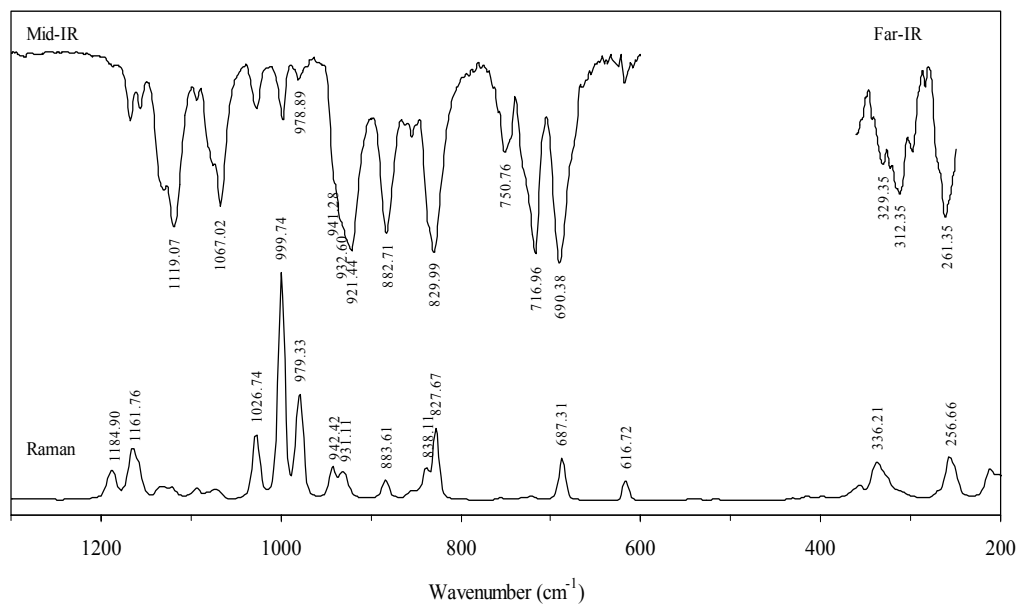

Mid- and far-infrared ATR (in transmittance) and Raman (absorption) spectra of crystalline  $[\{(\text{UO}_2)(\text{TPPO})_3\}_2(\mu\text{-O}_2)][(\text{ReO}_4)_2]$  (2)

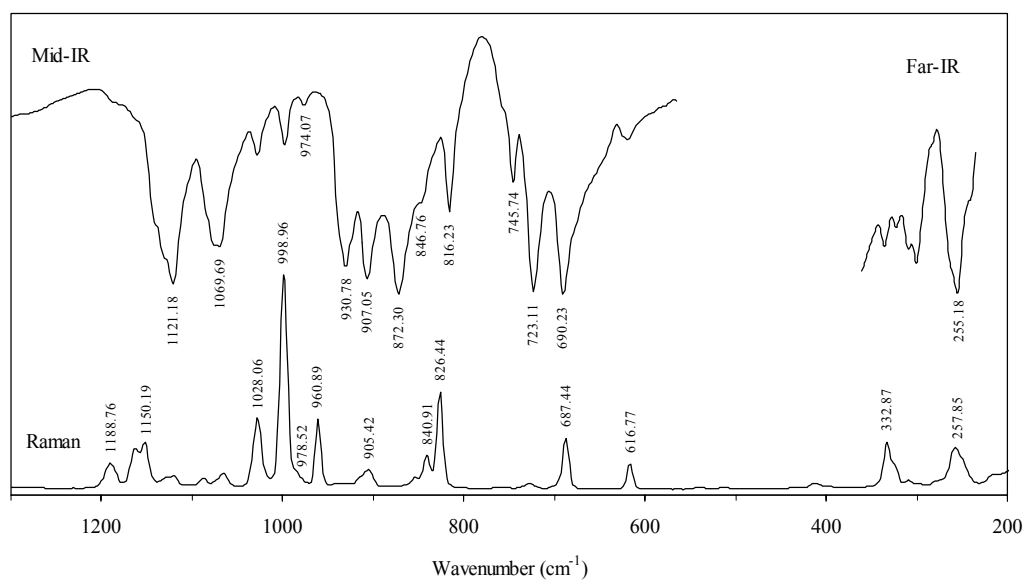

Mid- and far-infrared ATR (transmittance) spectra and Raman (absorption) spectrum of crystalline  $[\text{NpO}_2(\text{TPPO})_4][\text{ReO}_4]$  (3)

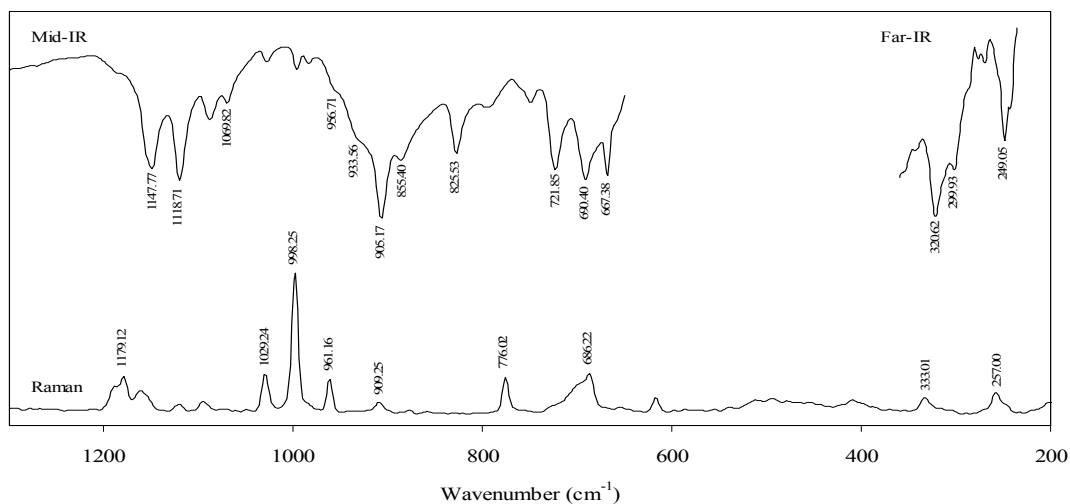

Mid-infrared ATR (in transmission) and Raman (absorption) spectra of  $[\text{UO}_2(\text{ReO}_4)_2(\text{TPPO})_3]$  (1)  
solid line = solution      Dashed line = solid      \* =  $\text{CD}_2\text{Cl}_2$  solvent

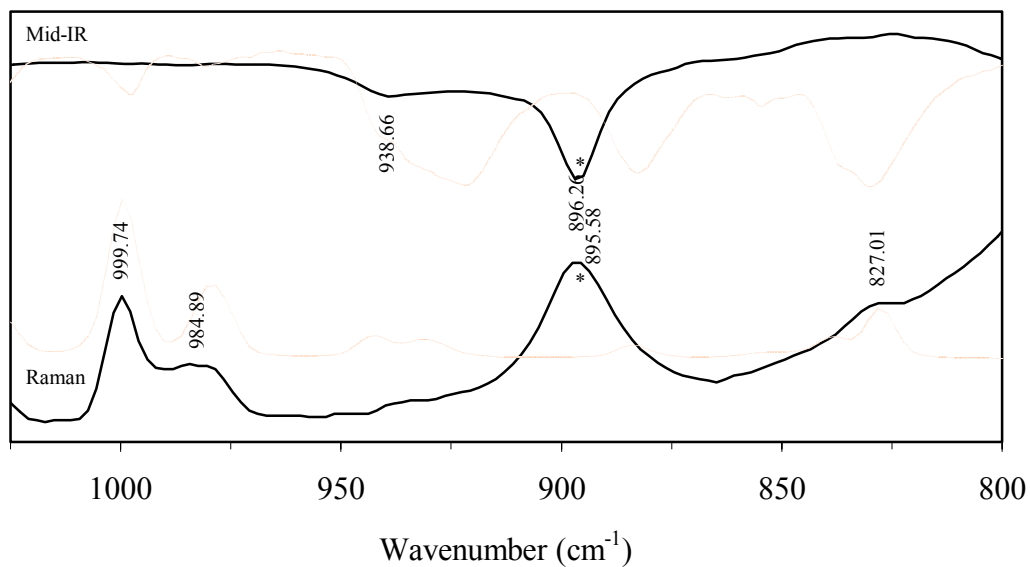

Raman (absorption) spectrum of an ethanolic solution of  $\{\text{NpO}_2\}^+/\text{[ReO}_4\text{]}^-/\text{TPPO}$  (1:1:4 stoichiometry)

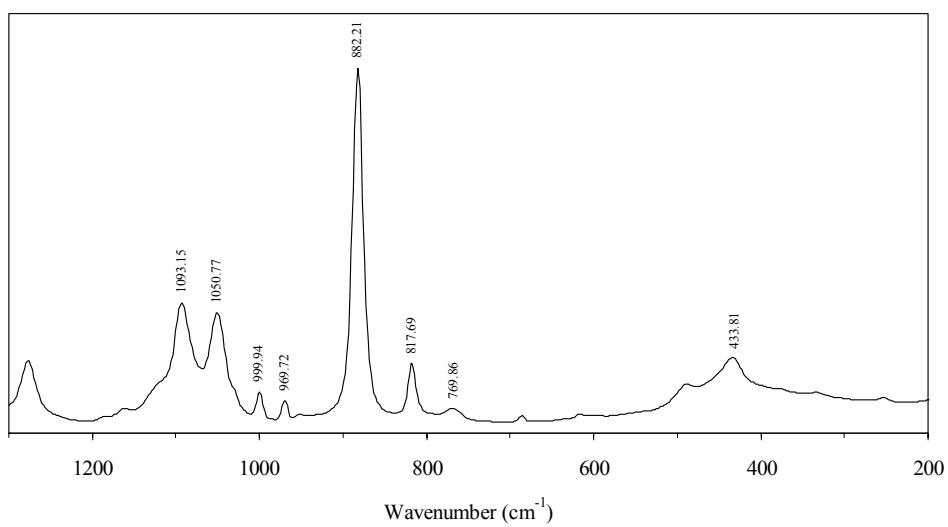

Solid state  $^{31}\text{P}$  CPMAS NMR spectrum (121 MHz) at 298 K for powdered  $[\text{UO}_2(\text{ReO}_4)_2(\text{TPPO})_3]$  (**1**)

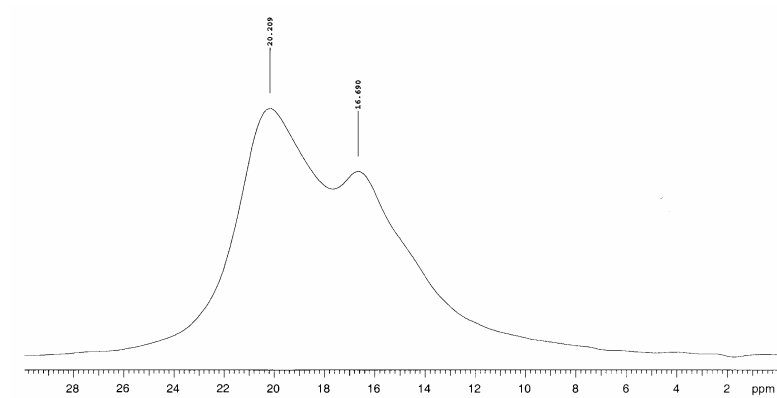

Supplementary Material (ESI) for Dalton Transactions  
This journal is © The Royal Society of Chemistry 2003

Solution state variable temperature (183-273 K)  $^{31}\text{P}$  NMR spectrum (162 MHz) for  $[\text{UO}_2(\text{ReO}_4)_2(\text{TPPO})_3]$  (**1**) in  $\text{CD}_2\text{Cl}_2$

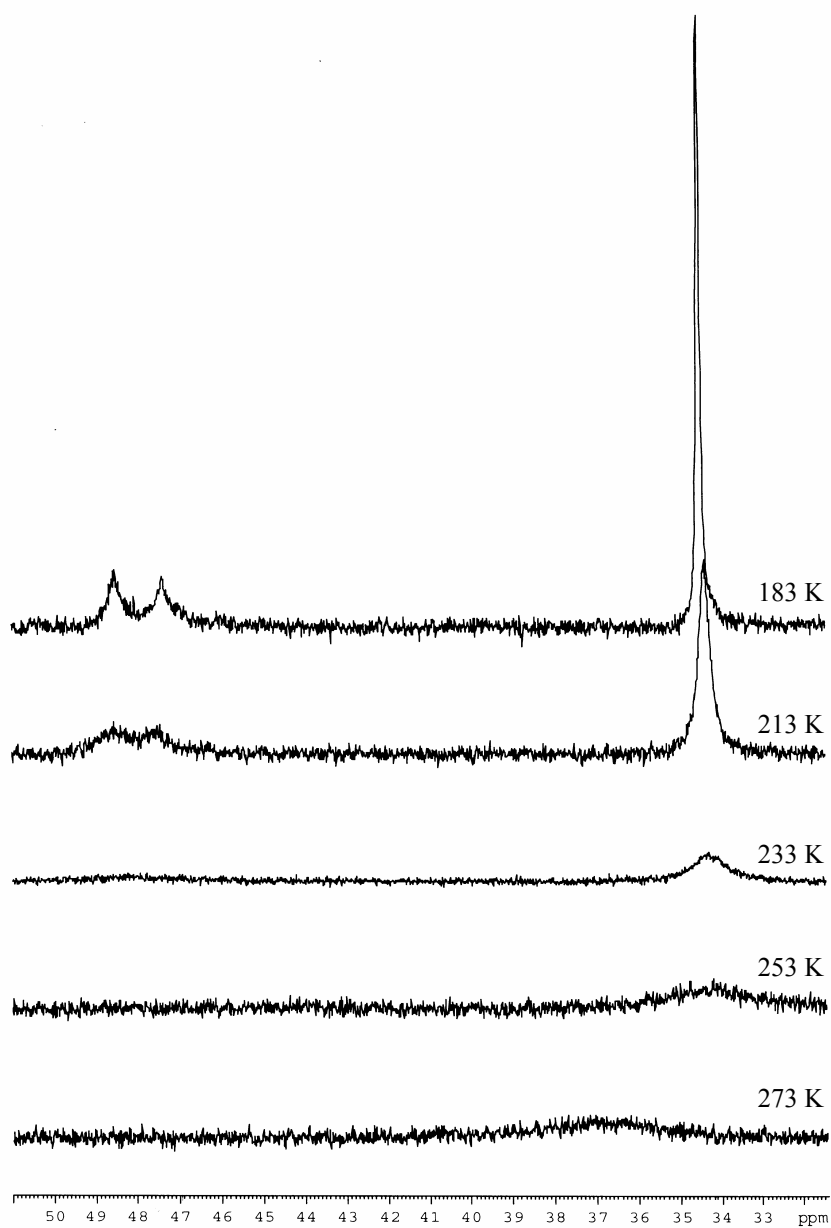

Supplement: b313045b.pdf [file b313045b.pdf]
